# Supplementary material
Source: ML conference proceedings conference paper supplement (https://openaccess.thecvf.com/content/CVPR2026/html/Han_YOLO-ULM_Ultra-Lightweight_Models_CVPR_2026_paper.html)
Supplement: Supplementary file 1 [file Appendix.pdf › 32839_supp/Appendix.pdf]

# YOLO-ULM: Ultra-Lightweight Models for Real-Time Object Detection

## Supplementary Material

### 1. Appendix

In this supplementary document, we first present the detailed hyperparameter configurations in Section 1.1. Section 1.2 provides a detailed performance comparison between YOLO-ULM-Turbo and YOLOv12-Turbo. Section 1.3 benchmarks the inference speeds of real-time detection models on different devices platforms.

#### 1.1. Hyper-parameter

We follow the fine-tuning details of [2, 4, 5, 7], including training settings, loss parameters, and augmentation parameters. YOLO-ULM is trained from scratch using the SGD optimizer for 600 epochs. The SGD momentum and weight decay are set to 0.937 and  $5 \times 10^{-4}$ , respectively. The initial learning rate is  $1 \times 10^{-2}$ , linearly decreasing to  $1 \times 10^{-4}$ . For data augmentation, we employ Mosaic [1, 6], Mixup [8], and copy-paste augmentation [9], as in [4]. Specific details are shown in Tab. 1. All models are trained on 8 NVIDIA RTX 4090 GPUs, and following [2–4].

Table 1. Hyperparameters of YOLO-ULM on COCO dataset used in our experimental evaluation on RTX 4090 GPUs and AMD 7502 CPUs.

| Hyperparameters             | YOLO-ULM-N/S/M/L/X     |
|-----------------------------|------------------------|
| Training Configuration      |                        |
| Epochs                      | 600                    |
| Optimizer                   | SGD                    |
| Momentum                    | 0.937                  |
| Batch size                  | $32 \times 8$          |
| Weight decay                | $5 \times 10^{-4}$     |
| Warm-up epochs              | 3                      |
| Warm-up momentum            | 0.8                    |
| Warm-up bias learning rate  | 0.0                    |
| Initial learning rate       | $10^{-2}$              |
| Final learning rate         | $10^{-4}$              |
| Learning rate schedule      | Linear decay           |
| Loss Parameters             |                        |
| Box loss gain               | 7.5                    |
| Class loss gain             | 0.5                    |
| DFL loss gain               | 1.5                    |
| Augmentation Parameters     |                        |
| HSV saturation augmentation | 0.7                    |
| HSV value augmentation      | 0.4                    |
| HSV hue augmentation        | 0.015                  |
| Translation augmentation    | 0.1                    |
| Scale augmentation          | 0.5/0.9/0.9/0.9/0.9    |
| Mosaic augmentation         | 1.0                    |
| Mixup augmentation          | 0.0/0.05/0.15/0.15/0.2 |
| Copy-paste augmentation     | 0.1/0.15/0.4/0.5/0.6   |
| Close mosaic epochs         | 10                     |

#### 1.2. Performance Comparison between YOLO-ULM-Turbo and YOLOv12-Turbo.

As shown in Tab. 3, YOLO-ULM-Turbo achieves faster speeds at various model scales than YOLOv12-Turbo.

Table 2. Comparison of inference latency on RTX 4090 GPUs and AMD 7502 CPUs.

| Model          | Scale | FLOPs↓ | #Param.↓ | Latency(GPU)↓ | Latency(CPU)↓ |
|----------------|-------|--------|----------|---------------|---------------|
| YOLOv8         | N     | 8.7    | 3.2      | 0.6           | 35.4          |
|                | S     | 28.6   | 11.2     | 0.7           | 74.6          |
|                | M     | 78.9   | 25.9     | 1.1           | 170.5         |
|                | L     | 165.2  | 43.7     | 1.6           | 300.2         |
|                | X     | 257.8  | 68.2     | 2.3           | 465.8         |
| YOLOv9         | S     | 26.4   | 7.1      | 1.2           | 88.4          |
|                | M     | 76.3   | 20.0     | 1.4           | 188.3         |
|                | C     | 102.1  | 25.3     | 1.5           | 238.0         |
| YOLOv10        | N     | 6.7    | 2.3      | 0.8           | 36.8          |
|                | S     | 21.6   | 7.2      | 0.9           | 68.1          |
|                | M     | 59.1   | 15.4     | 1.2           | 152.7         |
|                | B     | 92.0   | 19.1     | 1.4           | 198.8         |
|                | L     | 120.3  | 24.4     | 1.8           | 246.2         |
|                | X     | 160.4  | 29.5     | 2.3           | 348.7         |
| YOLOv11        | N     | 6.5    | 2.6      | 0.7           | 37.0          |
|                | S     | 21.5   | 9.4      | 0.8           | 68.6          |
|                | M     | 68.0   | 20.1     | 1.2           | 172.7         |
|                | L     | 86.9   | 25.3     | 1.6           | 205.2         |
|                | X     | 194.9  | 56.9     | 2.3           | 425.5         |
| YOLOv12        | N     | 6.5    | 2.6      | 1.0           | 44.2          |
|                | S     | 21.4   | 9.3      | 1.2           | 81.7          |
|                | M     | 67.5   | 20.2     | 1.6           | 185.3         |
|                | L     | 88.9   | 26.4     | 2.6           | 267.8         |
|                | X     | 199.0  | 59.1     | 3.6           | 508.2         |
| YOLOv13        | N     | 6.4    | 2.5      | 1.5           | 44.7          |
|                | S     | 20.8   | 9.0      | 1.6           | 75.9          |
|                | L     | 88.4   | 27.6     | 2.9           | 220.2         |
|                | X     | 199.2  | 64.0     | 3.9           | 412.0         |
| YOLO-ULM       | N     | 6.4    | 2.1      | 0.7           | 36.8          |
|                | S     | 21.2   | 7.4      | 0.9           | 63.8          |
|                | M     | 70.2   | 16.0     | 1.2           | 152.6         |
|                | L     | 95.1   | 22.8     | 1.7           | 201.0         |
|                | X     | 213.1  | 51.0     | 2.5           | 405.1         |
| YOLO-ULM-Turbo | N     | 5.8    | 2.1      | 0.7           | 32.7          |
|                | S     | 18.8   | 7.2      | 0.9           | 55.5          |
|                | M     | 59.3   | 15.1     | 1.1           | 128.3         |
|                | L     | 81.6   | 21.6     | 1.6           | 167.8         |
|                | X     | 182.6  | 48.1     | 2.3           | 336.5         |

At 1.48ms / image latency, YOLO-ULM-Turbo-N attains 40.7% mAP with only 5.8G FLOPs and 2.1M parameters. YOLO-ULM-Turbo demonstrates superior inference speeds across all variants (N, S, M, L, X) compared to YOLOv12-Turbo variants, while achieving FLOPs reductions of 3.3%, 3.1%, 0.8%, 1.0%, and 3.4%, with parameter reductions reaching 16%, 20.9%, 23.0%, 18.5%, and 19.1% respectively.

#### 1.3. Inference Speed on Different Devices

Tab. 2 presents a comparison of inference speed among different device platforms. We evaluate the FP16 precision of YOLOv8-v13, YOLO-ULM, and YOLO-ULM-Turbo on RTX 4090 GPUs. The YOLOv8-v13 architectures were benchmarked under Ultralytics unified framework (GitHub codebase) [3]. Both YOLO-ULM and YOLO-ULM-Turbo demonstrate higher inference speeds on RTX 4090 GPUs and CPU than baseline YOLOv12, while maintaining consistency with YOLOv10 and YOLOv11. For instance, YOLO-ULM-N and YOLO-ULM-Turbo-N (both latency are 0.7 ms / image) achieve 30% lower inference latency than YOLOv12-N with 1.0 ms / image latency. YOLO-ULM-S and YOLO-ULM-Turbo-S

Table 3. Comparison between YOLO-ULM-Turbo and YOLOv12-Turbo. All training settings are consistent with YOLO-ULM.

| Model                   | FLOPs(G)↓    | #Param.(M)↓ | $AP_{50:95}^{val}(\%)$ ↑ | $AP_{50}^{val}(\%)$ ↑ | $AP_{75}^{val}(\%)$ ↑ | Latency(ms)↓ |
|-------------------------|--------------|-------------|--------------------------|-----------------------|-----------------------|--------------|
| YOLOv12-Turbo-N         | 6.0          | 2.5         | 40.4                     | 55.9                  | 43.5                  | 1.6          |
| <b>YOLO-ULM-Turbo-N</b> | <b>5.8</b>   | <b>2.1</b>  | <b>40.7</b>              | <b>56.7</b>           | <b>44.0</b>           | <b>1.48</b>  |
| YOLOv12-Turbo-S         | 19.4         | 9.1         | 47.6                     | 64.5                  | 51.5                  | 2.42         |
| <b>YOLO-ULM-Turbo-S</b> | <b>18.8</b>  | <b>7.2</b>  | <b>47.7</b>              | <b>64.7</b>           | <b>51.8</b>           | <b>2.39</b>  |
| YOLOv12-Turbo-M         | 59.8         | 19.6        | 52.5                     | 69.9                  | 57.1                  | 4.27         |
| <b>YOLO-ULM-Turbo-M</b> | <b>59.3</b>  | <b>15.1</b> | <b>52.4</b>              | <b>69.8</b>           | <b>57.2</b>           | <b>4.23</b>  |
| YOLOv12-Turbo-L         | 82.4         | 26.5        | 53.8                     | 71.0                  | 58.6                  | 5.83         |
| <b>YOLO-ULM-Turbo-L</b> | <b>81.6</b>  | <b>21.6</b> | <b>53.8</b>              | <b>71.1</b>           | <b>58.8</b>           | <b>5.75</b>  |
| YOLOv12-Turbo-X         | 184.6        | 59.3        | 55.4                     | 72.5                  | 60.3                  | 10.38        |
| <b>YOLO-ULM-Turbo-X</b> | <b>178.4</b> | <b>48.0</b> | <b>55.3</b>              | <b>72.6</b>           | <b>60.4</b>           | <b>10.21</b> |

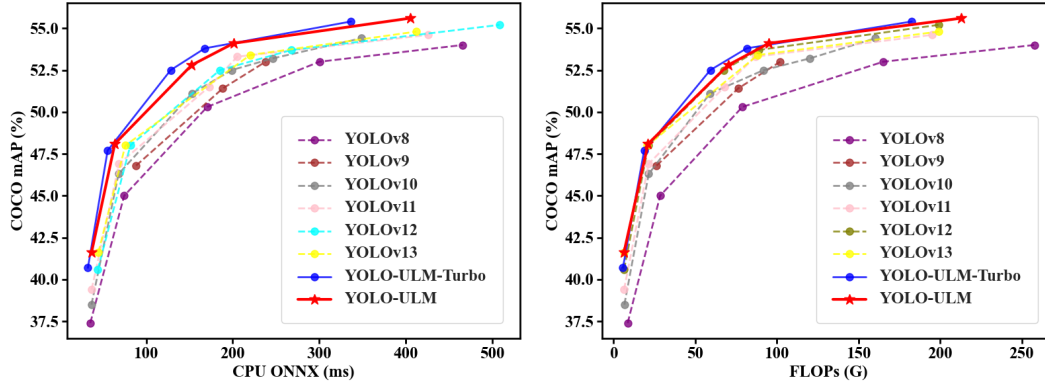

Figure 1. Comparison with popular methods in terms of accuracy-latency trade-off on CPU (left) and accuracy-FLOPs (right).

achieve a 43.8% reduction in inference latency relative to YOLOv13-S. YOLOv12-X shows 3.6 ms / image, while YOLO-ULM-X and YOLO-ULM-Turbo-X reach 2.5 ms / image and 2.3 ms / image, respectively. Consistent improvements persist across S, M, and L variants. Tab. 2 also compares inference speeds on the AMD EPYC 7502 32-Core Processor CPU. We evaluate the performance of our models and other competitors using OpenCV Deep Neural Network (DNN). YOLO-ULM-Turbo achieves state-of-the-art latency reduction across model scales, with its YOLO-ULM-Turbo-L variant demonstrating 37.3% lower inference time (167.8 ms / image) than YOLOv12 (267.8 ms / image) on CPU. Other variants also demonstrate similar reductions in inference latency.

As shown in Fig. 1 (left), the trade-off between accuracy and latency on CPU is presented in the form of a line graph. Meanwhile, FLOPs of different variants were also compared in Fig. 1 (right). YOLO-ULM and YOLO-ULM-Turbo also show state-of-the-art trade-offs in terms of performance and efficiency.

## References

[1] Alexey Bochkovskiy, Chien-Yao Wang, and Hong-Yuan Mark Liao. Yolov4: Optimal speed and accuracy of object detection,

2020. 1  
[2] Jocher Glenn. Yolov8. <https://github.com/ultralytics/ultralytics/tree/main>, 2023. 1  
[3] Glenn Jocher. Yolov11. <https://github.com/ultralytics>, 2024. 1  
[4] Yunjie Tian, Qixiang Ye, and David Doermann. Yolov12: Attention-centric real-time object detectors, 2025. 1  
[5] Ao Wang, Hui Chen, Lihao Liu, Kai Chen, Zijia Lin, Jungong Han, and Guiguang Ding. Yolov10: Real-time end-to-end object detection, 2024. 1  
[6] Chien-Yao Wang, Alexey Bochkovskiy, and Hong-Yuan Mark Liao. Yolov7: Trainable bag-of-freebies sets new state-of-the-art for real-time object detectors. In *Proceedings of the IEEE/CVF Conference on Computer Vision and Pattern Recognition (CVPR)*, pages 7464–7475, 2023. 1  
[7] Chien-Yao Wang, I-Hau Yeh, and Hong-Yuan Mark Liao. Yolov9: Learning what you want to learn using programmable gradient information, 2024. 1  
[8] Hongyi Zhang, Moustapha Cisse, Yann N. Dauphin, and David Lopez-Paz. mixup: Beyond empirical risk minimization, 2018. 1  
[9] Xizhou Zhu, Weijie Su, Lewei Lu, Bin Li, Xiaogang Wang, and Jifeng Dai. Deformable detr: Deformable transformers for end-to-end object detection, 2021. 1
